# Supplementary material for: In situ devices can culture the microbial dark matter of corals
Source: PubMed Central journal article supplement — iScience. 2023 Nov 13;26(12):108374. doi: 10.1016/j.isci.2023.108374 (PMC10755713; doi:10.1016/j.isci.2023.108374), 2023-11-13
Supplement: mmc1.pdf [file mmc1.pdf]

iScience, Volume 26

## Supplemental information

### ***In situ* devices can culture the microbial dark matter of corals**

**Flávio Modolon, Júnia Schultz, Gustavo Duarte, Caren Leite Spindola Vilela, Torsten Thomas, and Raquel Silva Peixoto**

**TABLE S1 - Differences in the microbial community structure from amplicon sequencing data, related to FIG 2d.** Differences in the microbial community structure among the samples by performing permutational multivariate analysis of variance (PERMANOVA) on the community matrix generated by UniFrac Weighted. Groups 1 and 2 indicate the sample groups compared to each other. Symbol ‘\*’ indicates significant differences between methods/sample groups (p-value  $\leq 0.05$ ).

| Sample set                  |                             | PERMANOVA | PERMDISP | Sample set               |                          | PERMANOVA | PERMDISP |
|-----------------------------|-----------------------------|-----------|----------|--------------------------|--------------------------|-----------|----------|
| Group 1                     | Group 2                     | Pr(>F)    | p-adj    | Group 1                  | Group 2                  | Pr(>F)    | p-adj    |
| chamber2_close_subculture   | chamber1_distant_subculture | 0.175     | 1.000    | chip2_close_subculture   | chip1_distant_subculture | 0.095     | 0.907    |
| chamber2_close_subculture   | chamber2_distant_subculture | 0.537     | 1.000    | chip2_close_subculture   | chip2_distant_subculture | 0.054     | 1.000    |
| chamber2_close_subculture   | chamber1_close_subculture   | 0.216     | 0.997    | chip2_close_subculture   | chip1_close_subculture   | 0.301     | 1.000    |
| chamber2_close_subculture   | Traditional_cultivation     | 0.008*    | 1.000    | chip2_close_subculture   | Traditional_cultivation  | 0.008*    | 0.952    |
| chamber2_close_subculture   | Mucus inoculum              | 0.023*    | 1.000    | chip2_close_subculture   | Mucus inoculum           | 0.023*    | 0.984    |
| chamber1_distant_subculture | chamber2_distant_subculture | 0.128     | 0.928    | chip1_distant_subculture | chip2_distant_subculture | 0.452     | 0.999    |
| chamber1_distant_subculture | chamber1_close_subculture   | 0.342     | 0.792    | chip1_distant_subculture | chip1_close_subculture   | 0.866     | 1.000    |
| chamber1_distant_subculture | Traditional_cultivation     | 0.006*    | 1.000    | chip1_distant_subculture | Traditional_cultivation  | 0.007*    | 1.000    |
| chamber1_distant_subculture | Mucus inoculum              | 0.019*    | 1.000    | chip1_distant_subculture | Mucus inoculum           | 0.167     | 1.000    |
| chamber2_distant_subculture | chamber1_close_subculture   | 0.536     | 1.000    | chip2_distant_subculture | chip1_close_subculture   | 0.62      | 1.000    |
| chamber2_distant_subculture | Traditional_cultivation     | 0.01*     | 1.000    | chip2_distant_subculture | Traditional_cultivation  | 0.013*    | 1.000    |
| chamber2_distant_subculture | Mucus inoculum              | 0.021*    | 1.000    | chip2_distant_subculture | Mucus inoculum           | 0.045*    | 1.000    |
| chamber1_close_subculture   | Traditional_cultivation     | 0.015*    | 0.996    | chip1_close_subculture   | Traditional_cultivation  | 0.013*    | 1.000    |
| chamber1_close_subculture   | Mucus inoculum              | 0.153     | 0.994    | chip1_close_subculture   | Mucus inoculum           | 0.028*    | 1.000    |
| chamber1_distant            | chamber2_distant            | 0.858     | 1.000    | chip1_distant            | chip2_distant            | 0.023*    | 1.000    |
| chamber1_distant            | chamber1_close              | 0.082     | 0.457    | chip1_distant            | chip1_close              | 0.099     | 1.000    |
| chamber1_distant            | chamber2_close              | 0.842     | 1.000    | chip1_distant            | chip2_close              | 0.036*    | 1.000    |
| chamber1_distant            | Traditional_cultivation     | 0.005*    | 0.533    | chip1_distant            | Traditional_cultivation  | 0.011*    | 1.000    |
| chamber1_distant            | Mucus inoculum              | 0.032*    | 0.552    | chip1_distant            | Mucus inoculum           | 0.026*    | 1.000    |

|                         |                         |        |       |               |                         |        |       |
|-------------------------|-------------------------|--------|-------|---------------|-------------------------|--------|-------|
| chamber2_distant        | chamber1_close          | 0.119  | 0.145 | chip2_distant | chip1_close             | 0.334  | 1.000 |
| chamber2_distant        | chamber2_close          | 0.806  | 1.000 | chip2_distant | chip2_close             | 0.205  | 1.000 |
| chamber2_distant        | Traditional_cultivation | 0.009* | 0.172 | chip2_distant | Traditional_cultivation | 0.005* | 1.000 |
| chamber2_distant        | Mucus inoculum          | 0.029* | 0.195 | chip2_distant | Mucus inoculum          | 0.039* | 1.000 |
| chamber1_close          | chamber2_close          | 0.156  | 0.377 | chip1_close   | chip2_close             | 0.412  | 1.000 |
| chamber1_close          | Traditional_cultivation | 0.008* | 1.000 | chip1_close   | Traditional_cultivation | 0.008* | 1.000 |
| chamber1_close          | Mucus inoculum          | 0.023* | 1.000 | chip1_close   | Mucus inoculum          | 0.035* | 1.000 |
| chamber2_close          | Traditional_cultivation | 0.011* | 0.445 | chip2_close   | Traditional_cultivation | 0.008* | 1.000 |
| chamber2_close          | Mucus inoculum          | 0.021* | 0.467 | chip2_close   | Mucus inoculum          | 0.034* | 1.000 |
| Traditional_cultivation | Mucus inoculum          | 0.012* | 1.000 |               |                         |        |       |

**TABLE S2 - Pairwise comparison for Sørensen dissimilarity, related to FIG 2e.** Symbol ‘\*’ indicates significant differences between groups ( $\text{Pr}[\text{>F}] < 0.05$ , PERMANOVA).

| Sample set       |                         | PERMANOVA<br>Pr(>F) | PERMDISP<br>p-adj | Sample set    |                         | PERMANOVA<br>Pr(>F) | PERMDISP<br>p-adj |
|------------------|-------------------------|---------------------|-------------------|---------------|-------------------------|---------------------|-------------------|
| Group1           | Group2                  |                     |                   | Group1        | Group2                  |                     |                   |
| Chamber1_close   | Chamber2_close          | 0.068               | 0.989             | Chip1_close   | Chip2_close             | 0.567               | 1.000             |
| Chamber1_close   | Traditional_cultivation | 0.011*              | 1.000             | Chip1_close   | Traditional_cultivation | 0.013*              | 1.000             |
| Chamber2_close   | Traditional_cultivation | 0.016*              | 0.979             | Chip2_close   | Traditional_cultivation | 0.006*              | 1.000             |
| Chamber1_distant | Chamber2_distant        | 0.426               | 1.000             | Chip1_distant | Chip2_distant           | 0.038*              | 1.000             |
| Chamber1_distant | Chamber1_close          | 0.03*               | 0.917             | Chip1_distant | Chip1_close             | 0.068               | 1.000             |
| Chamber1_distant | Traditional_cultivation | 0.012*              | 0.871             | Chip1_distant | Traditional_cultivation | 0.009*              | 1.000             |
| Chamber2_distant | Chamber2_close          | 0.225               | 1.000             | Chip2_distant | Chip2_close             | 0.422               | 1.000             |

|                             |                             |        |       |                          |                          |        |        |
|-----------------------------|-----------------------------|--------|-------|--------------------------|--------------------------|--------|--------|
| Chamber2_distant            | Traditional_cultivation     | 0.01*  | 0.691 | Chip2_distant            | Traditional_cultivation  | 0.007* | 1.000  |
| Chamber1_close_subculture   | Traditional_cultivation     | 0.008* | 0.419 | Chip1_close_subculture   | Traditional_cultivation  | 0.011* | 0.980  |
| Chamber1_distant_subculture | Chamber2_distant_subculture | 0.14   | 0.955 | Chip2_close_subculture   | Chip2_distant_subculture | 0.037* | 1.000  |
| Chamber1_distant_subculture | Chamber1_close_subculture   | 0.256  | 0.366 | Chip2_close_subculture   | Chip1_close_subculture   | 0.036* | 0.988  |
| Chamber1_distant_subculture | Traditional_cultivation     | 0.007* | 1.000 | Chip2_close_subculture   | Traditional_cultivation  | 0.012* | 1.000  |
| Chamber2_distant_subculture | Traditional_cultivation     | 0.005* | 0.979 | Chip1_distant_subculture | Chip2_distant_subculture | 0.68   | 0.997  |
| Chamber2_close_subculture   | Chamber2_distant_subculture | 0.522  | 1.000 | Chip1_distant_subculture | Chip1_close_subculture   | 0.359  | 1.000  |
| Chamber2_close_subculture   | Chamber1_close_subculture   | 0.355  | 0.875 | Chip1_distant_subculture | Traditional_cultivation  | 0.011* | 0.980  |
| Chamber2_close_subculture   | Traditional_cultivation     | 0.011* | 1.000 | Chip2_distant_subculture | Traditional_cultivation  | 0.011* | 1.000  |
| Mucus inoculum              | Chamber1_close              | 0.037* | 0.278 | Mucus inoculum           | Chip1_close              | 0.031* | 0.319  |
| Mucus inoculum              | Chamber2_close              | 0.022* | 0.992 | Mucus inoculum           | Chip2_close              | 0.033* | 0.644  |
| Mucus inoculum              | Chamber1_distant            | 0.026* | 0.173 | Mucus inoculum           | Chip1_distant            | 0.024* | 0.757  |
| Mucus inoculum              | Chamber2_distant            | 0.028* | 1.000 | Mucus inoculum           | Chip2_distant            | 0.024* | 0.412  |
| Mucus inoculum              | Chamber1_close_subculture   | 0.143  | 1.000 | Mucus inoculum           | Chip1_close_subculture   | 0.064  | 0.632  |
| Mucus inoculum              | Chamber1_distant_subculture | 0.041* | 0.173 | Mucus inoculum           | Chip2_close_subculture   | 0.037* | 0.029* |
| Mucus inoculum              | Chamber2_close_subculture   | 0.034* | 0.647 | Mucus inoculum           | Chip1_distant_subculture | 0.117  | 0.991  |
| Mucus inoculum              | Chamber2_distant_subculture | 0.028* | 0.992 | Mucus inoculum           | Chip2_distant_subculture | 0.025* | 0.378  |

**TABLE S3 - Accession IDs and NCBI's BLAST best hits, related to FIG 5.** Accession IDs and NCBI's BLAST best hit of the 16S rRNA sequences of the bacterial isolates.

| Isolate | Accession | Source  | Best hit                                                | Query Cover | E-value | Per. ident | Acc. Len | Best hit Accession |
|---------|-----------|---------|---------------------------------------------------------|-------------|---------|------------|----------|--------------------|
| CL4     | OQ435519  | Chamber | <i>Marinobacter nauticus</i> ATCC 49840                 | 100%        | 0       | 99.72      | 1520     | NR_074619.1        |
| CL5     | OQ435520  | Chamber | <i>Vibrio harveyi</i> strain NCIMB1280                  | 99%         | 0       | 99.36      | 1436     | NR_043165.1        |
| CP1.2   | OQ435521  | Chamber | <i>Roseibium aggregatum</i> strain NBRC 16684           | 99%         | 0       | 99.7       | 1408     | NR_113861.1        |
| CP2     | OQ435522  | Chamber | <i>Roseivirga pacifica</i> strain DY53                  | 99%         | 0       | 98.9       | 1442     | NR_109732.1        |
| CP3     | OQ435523  | Chamber | <i>Pseudoalteromonas flavipulchra</i> strain NCIMB 2033 | 100%        | 0       | 99.93      | 1483     | NR_025126.1        |
| CP4.1   | OQ435524  | Chamber | <i>Oceanicaulis stylophorae</i> strain GISW-4           | 99%         | 0       | 99.17      | 1401     | NR_108907.1        |
| CP4.2   | OQ435525  | Chamber | <i>Bacterioplanes sanyensis</i> strain GYP-2            | 100%        | 0       | 98.79      | 1412     | NR_126264.1        |
| CP5     | OQ435526  | Chamber | <i>Marinobacter sediminum</i> strain R65                | 100%        | 0       | 97.18      | 1512     | NR_029028.1        |
| CP6     | OQ435527  | Chamber | <i>Tritonibacter multivorans</i> strain MD5             | 100%        | 0       | 97.06      | 1405     | NR_108509.1        |
| CPX1.1  | OQ435528  | Chamber | <i>Alteromonas macleodii</i> strain NBRC 102226         | 99%         | 0       | 98.61      | 1458     | NR_114053.1        |
| CPX2    | OQ435529  | Chamber | <i>Roseibium aggregatum</i> strain NBRC 16684           | 99%         | 0       | 98.7       | 1408     | NR_113861.1        |
| iL2     | OQ435530  | Chip    | <i>Leisingera daeponensis</i> DSM 23529 strain TF-218   | 100%        | 0       | 97.98      | 1419     | NR_044026.1        |
| iL6     | OQ435531  | Chip    | <i>Roseibium aggregatum</i> strain NBRC 16684           | 100%        | 0       | 99.7       | 1408     | NR_113861.1        |
| iL8     | OQ435532  | Chip    | <i>Vibrio nigripulchritudo</i> ATCC 27043               | 100%        | 0       | 98.45      | 1470     | NR_117897.1        |
| iL10    | OQ435533  | Chip    | <i>Oceanicaulis stylophorae</i> strain GISW-4           | 97%         | 0       | 98.21      | 1401     | NR_108907.1        |
| iL11    | OQ435534  | Chip    | <i>Roseibium aggregatum</i> strain NBRC 16684           | 100%        | 0       | 99.93      | 1408     | NR_113861.1        |
| iL12.1  | OQ435535  | Chip    | <i>Vibrio aestivus</i> strain M22                       | 99%         | 0       | 97.43      | 1463     | NR_108873.1        |
| iL14    | OQ435536  | Chip    | <i>Roseibium aggregatum</i> strain NBRC 16684           | 100%        | 0       | 98.59      | 1408     | NR_113861.1        |

|        |          |             |                                                  |      |   |       |      |             |
|--------|----------|-------------|--------------------------------------------------|------|---|-------|------|-------------|
| iL15   | OQ435537 | Chip        | <i>Leisingera aquimarina</i> strain R-26159      | 99%  | 0 | 97.52 | 1396 | NR_042670.1 |
| iLP    | OQ435538 | Chip        | <i>Roseibium aggregatum</i> strain NBRC 16684    | 100% | 0 | 98.21 | 1408 | NR_113861.1 |
| iP3    | OQ435539 | Chip        | <i>Halobacillus trueperi</i> strain DSM 10404    | 99%  | 0 | 99.5  | 1536 | NR_025459.1 |
| iP4    | OQ435540 | Chip        | <i>Robertkochia marina</i> strain CC-AMO-30D     | 97%  | 0 | 98.96 | 1480 | NR_160524.1 |
| iP5    | OQ435541 | Chip        | <i>Microbulbifer variabilis</i> strain Ni-2088   | 98%  | 0 | 99.27 | 1492 | NR_041021.1 |
| iP6    | OQ435542 | Chip        | <i>Roseibium aggregatum</i> strain NBRC 16684    | 98%  | 0 | 98.67 | 1408 | NR_113861.1 |
| iP7.1  | OQ435543 | Chip        | <i>Maricaulis virginensis</i> strain VC 5        | 99%  | 0 | 99.4  | 1420 | NR_025444.1 |
| iP9.2  | OQ435544 | Chip        | <i>Roseibium aggregatum</i> strain NBRC 16684    | 100% | 0 | 99.85 | 1408 | NR_113861.1 |
| iP12   | OQ435545 | Chip        | <i>Halobacillus kuroshimensis</i> strain IS-Hb7  | 100% | 0 | 99.23 | 1544 | NR_041262.1 |
| iP14.1 | OQ435546 | Chip        | <i>Bacterioplanes sanyensis</i> strain GYP-2     | 99%  | 0 | 98.76 | 1412 | NR_126264.1 |
| iP14.3 | OQ435547 | Chip        | <i>Aquimarina litoralis</i> strain CNURIC011     | 100% | 0 | 98.69 | 1403 | NR_116703.1 |
| iP16   | OQ435548 | Chip        | <i>Roseibium aggregatum</i> strain NBRC 16684    | 100% | 0 | 99.85 | 1408 | NR_113861.1 |
| iP17   | OQ435549 | Chip        | <i>Muricauda aquimarina</i> strain SW-63         | 100% | 0 | 98.67 | 1481 | NR_042909.1 |
| iP20.1 | OQ435550 | Chip        | <i>Leisingera caerulea</i> DSM 24564             | 100% | 0 | 97.98 | 1402 | NR_118542.1 |
| iP20   | OQ435551 | Chip        | <i>Microbulbifer elongatus</i> strain DSM 6810   | 100% | 0 | 98.77 | 1491 | NR_025246.1 |
| iP22   | OQ435552 | Chip        | <i>Halobacillus kuroshimensis</i> strain IS-Hb7  | 99%  | 0 | 99.15 | 1544 | NR_041262.1 |
| iPX1   | OQ435553 | Chip        | <i>Shewanella waksmanii</i> strain KMM 3823      | 99%  | 0 | 99.29 | 1540 | NR_025684.1 |
| MP1    | OQ435554 | Traditional | <i>Halobacillus trueperi</i> strain DSM 10404    | 99%  | 0 | 99.51 | 1536 | NR_025459.1 |
| MP3    | OQ435555 | Traditional | <i>Roseibium aggregatum</i> strain NBRC 16684    | 100% | 0 | 98.81 | 1408 | NR_113861.1 |
| MP4    | OQ435556 | Traditional | <i>Pseudoalteromonas ruthenica</i> strain KMM300 | 100% | 0 | 99.21 | 1489 | NR_025140.1 |
| MP5    | OQ435557 | Traditional | <i>Roseibium aggregatum</i> strain NBRC 16684    | 100% | 0 | 99.92 | 1408 | NR_113861.1 |
| MP6    | OQ435558 | Traditional | <i>Ruegeria atlantica</i> strain NBRC 15792      | 98%  | 0 | 98.99 | 1385 | NR_112615.1 |

|        |          |             |                                               |      |   |       |      |             |
|--------|----------|-------------|-----------------------------------------------|------|---|-------|------|-------------|
| MP7.2  | OQ435559 | Traditional | <i>Roseibium aggregatum</i> strain NBRC 16684 | 100% | 0 | 99.85 | 1408 | NR_113861.1 |
| MP8    | OQ435560 | Traditional | <i>Roseibium album</i> strain 5OM6            | 100% | 0 | 98.43 | 1477 | NR_042378.1 |
| MP9.1  | OQ435561 | Traditional | <i>Roseibium aggregatum</i> strain NBRC 16684 | 100% | 0 | 99.93 | 1408 | NR_113861.1 |
| MP10   | OQ435562 | Traditional | <i>Roseibium aggregatum</i> strain NBRC 16684 | 99%  | 0 | 100   | 1408 | NR_113861.1 |
| MP11   | OQ435563 | Traditional | <i>Ruegeria arenilitoris</i> strain G-M8      | 99%  | 0 | 99.46 | 1384 | NR_109635.1 |
| MP13   | OQ435564 | Traditional | <i>Thalassotalea litorea</i> strain HMF4135   | 97%  | 0 | 98.97 | 1478 | NR_157659.1 |
| MP14   | OQ435565 | Traditional | <i>Ruegeria atlantica</i> strain NBRC 15792   | 100% | 0 | 99.01 | 1385 | NR_112615.1 |
| MP15.1 | OQ435566 | Traditional | <i>Ruegeria conchae</i> strain TW15           | 100% | 0 | 99.85 | 1384 | NR_109062.1 |
| MP15.2 | OQ435567 | Traditional | <i>Roseibium aggregatum</i> strain NBRC 16684 | 100% | 0 | 99.78 | 1408 | NR_113861.1 |
| MP16   | OQ435568 | Traditional | <i>Ruegeria arenilitoris</i> strain G-M8      | 99%  | 0 | 99.38 | 1384 | NR_109635.1 |
| MPV    | OQ435569 | Traditional | <i>Algihabitans albus</i> strain HHTR 118     | 100% | 0 | 99.33 | 1452 | NR_173537.1 |

---

**TABLE S4 - Sample dataset, related to STAR Methods (Method Details: Sampling, DNA extraction, and sequencing).** Dataset used for compositional analysis of microbiomes from amplicon sequencing data.

|    | Sample type                  | Description                                                                               | Synonyms                        | Replicates |
|----|------------------------------|-------------------------------------------------------------------------------------------|---------------------------------|------------|
| 1  | Chip 1 close                 | Content retrieved from the chip interior incubated with -2 dilution, close                | Chip content, device content    | 4          |
| 2  | Chip 2 close                 | Content retrieved from the chip interior incubated with -3 dilution, close                | Chip content, device content    | 4          |
| 3  | Chamber 1 close              | Content retrieved from the chamber interior incubated with -3 dilution, close             | Chamber content, device content | 4          |
| 4  | Chamber 2 close              | Content retrieved from the chamber interior incubated with -3 dilution, close             | Chamber content, device content | 4          |
| 5  | Chip 1 close subculture      | Colonies subcultivate in MA1:2 using the contents from chips with dilution -2, close      | Chip subculture                 | 4          |
| 6  | Chip 2 close subculture      | Colonies subcultivate in MA1:2 using the contents from chips with dilution -3, close      | Chip subculture                 | 4          |
| 7  | Chamber 1 close subculture   | Colonies subcultivate in MA1:2 using the contents from chambers with dilution -2, close   | Chamber subculture              | 4          |
| 8  | Chamber 2 close subculture   | Colonies subcultivate in MA1:2 using the contents from chambers with dilution -3, close   | Chamber subculture              | 4          |
| 9  | Chip 1 distant               | Content retrieved from the chip interior incubated with -2 dilution, distant              | Chip content, device content    | 4          |
| 10 | Chip 2 distant               | Content retrieved from the chip interior incubated with -3 dilution, distant              | Chip content, device content    | 4          |
| 11 | Chamber 1 distant            | Content retrieved from the chamber interior incubated with -3 dilution, distant           | Chamber content, device content | 4          |
| 12 | Chamber 2 distant            | Content retrieved from the chamber interior incubated with -3 dilution, distant           | Chamber content, device content | 4          |
| 13 | Chip 1 distant subculture    | Colonies subcultivate in MA1:2 using the contents from chips with dilution -2, distant    | Chip subculture                 | 4          |
| 14 | Chip 2 distant subculture    | Colonies subcultivate in MA1:2 using the contents from chips with dilution -3, distant    | Chip subculture                 | 4          |
| 15 | Chamber 1 distant subculture | Colonies subcultivate in MA1:2 using the contents from chambers with dilution -2, distant | Chamber subculture              | 4          |
| 16 | Chamber 2 distant subculture | Colonies subcultivate in MA1:2 using the contents from chambers with dilution -3, distant | Chamber subculture              | 4          |
| 17 | Traditional cultivation      | Conventional cultivation, using the mucus itself diluted and plated on MA1:2              | Traditional cultivation         | 5          |
| 18 | Mucus inoculum               | Mucus separated from the coral by centrifugation                                          | Mucus, Mucus inoculum           | 4          |



**TABLE S5 - Statistical comparisons between groups for Shannon index, related to FIG 1a.** Symbol ‘\*’ indicates significant differences between groups (p-value < 0.05, ANOVA).

| Sample set                  |                             |          | Sample set               |                           |          |
|-----------------------------|-----------------------------|----------|--------------------------|---------------------------|----------|
| Group 1                     | Group 2                     | p-value  | Group 1                  | Group 2                   | p-value  |
| Chamber1_distant_subculture | Chamber1_close_subculture   | 0.999    | Chip1_distant_subculture | Chip1_close_subculture    | 0.999    |
| Chamber2_close_subculture   | Chamber1_close_subculture   | 0.877    | Chip2_close_subculture   | Chip1_close_subculture    | 0.999    |
| Chamber2_distant_subculture | Chamber1_close_subculture   | 0.934    | Chip2_distant_subculture | Chip1_close_subculture    | 1.000    |
| Chamber2_close_subculture   | Chamber1_distant_subculture | 0.999    | Chip2_close_subculture   | Chip1_distant_subculture  | 1.000    |
| Chamber2_distant_subculture | Chamber1_distant_subculture | 0.999    | Chip2_distant_subculture | Chip1_distant_subculture  | 1.000    |
| Chamber2_distant_subculture | Chamber2_close_subculture   | 1.000    | Chip2_distant_subculture | Chip2_close_subculture    | 0.999    |
| Chamber1_distant            | Chamber1_close              | 0.124    | Chip1_distant            | Chip1_close               | 0.859    |
| Chamber2_close              | Chamber1_close              | 0.997    | Chip2_close              | Chip1_close               | 1.000    |
| Chamber2_distant            | Chamber1_close              | 0.846    | Chip2_distant            | Chip1_close               | 1.000    |
| Chamber1_distant            | Chamber1_close_subculture   | < 0.001* | Chip1_distant            | Chip1_close_subculture    | < 0.001* |
| Chamber2_close              | Chamber1_close_subculture   | 0.141    | Chip2_close              | Chip1_close_subculture    | 0.008*   |
| Chamber2_distant            | Chamber1_close_subculture   | 0.023*   | Chip2_distant            | Chip1_close_subculture    | 0.008*   |
| Chamber2_close              | Chamber1_distant            | 0.867    | Chip2_close              | Chip1_distant             | 0.860    |
| Chamber2_distant            | Chamber1_distant            | 0.998    | Chip2_distant            | Chip1_distant             | 0.857    |
| Chamber2_close              | Chamber1_distant_subculture | 0.749    | Chip2_close              | Chip1_distant_subculture  | < 0.001* |
| Chamber2_distant            | Chamber1_distant_subculture | 0.290    | Chip2_distant            | Chip1_distant_subculture  | < 0.001* |
| Chamber2_distant            | Chamber2_close              | 0.999    | Chip2_distant            | Chip2_close               | 1.000    |
| Chamber2_distant            | Chamber2_close_subculture   | 0.862    | Chip2_distant            | Chip2_close_subculture    | < 0.001* |
| Mucus inoculum              | Chamber1_close              | 0.072    | Traditional_cultivation  | Chamber1_close            | 1.000    |
| Mucus inoculum              | Chamber1_close_subculture   | 0.976    | Traditional_cultivation  | Chamber1_close_subculture | 0.836    |

|                |                             |          |
|----------------|-----------------------------|----------|
| Mucus inoculum | Chamber1_distant            | < 0.001* |
| Mucus inoculum | Chamber1_distant_subculture | 0.439    |
| Mucus inoculum | Chamber2_close              | 0.001    |
| Mucus inoculum | Chamber2_close_subculture   | 0.066    |
| Mucus inoculum | Chamber2_distant            | < 0.001* |
| Mucus inoculum | Chamber2_distant_subculture | 0.098    |
| Mucus inoculum | Chip1_close                 | 0.040*   |
| Mucus inoculum | Chip1_close_subculture      | 1.000    |
| Mucus inoculum | Chip1_distant               | < 0.001* |
| Mucus inoculum | Chip1_distant_subculture    | 0.997    |
| Mucus inoculum | Chip2_close                 | 0.039*   |
| Mucus inoculum | Chip2_close_subculture      | 0.959    |
| Mucus inoculum | Chip2_distant               | 0.041*   |
| Mucus inoculum | Chip2_distant_subculture    | 0.999    |

|                         |                             |          |
|-------------------------|-----------------------------|----------|
| Traditional_cultivation | Chamber1_distant            | 0.083    |
| Traditional_cultivation | Chamber1_distant_subculture | 0.999    |
| Traditional_cultivation | Chamber2_close              | 0.995    |
| Traditional_cultivation | Chamber2_close_subculture   | 1.000    |
| Traditional_cultivation | Chamber2_distant            | 0.797    |
| Traditional_cultivation | Chamber2_distant_subculture | 1.000    |
| Traditional_cultivation | Chip1_close                 | 1.000    |
| Traditional_cultivation | Chip1_close_subculture      | < 0.001* |
| Traditional_cultivation | Chip1_distant               | 0.667    |
| Traditional_cultivation | Chip1_distant_subculture    | < 0.001* |
| Traditional_cultivation | Chip2_close                 | 1.000    |
| Traditional_cultivation | Chip2_close_subculture      | < 0.001* |
| Traditional_cultivation | Chip2_distant               | 1.000    |
| Traditional_cultivation | Chip2_distant_subculture    | 0.003*   |

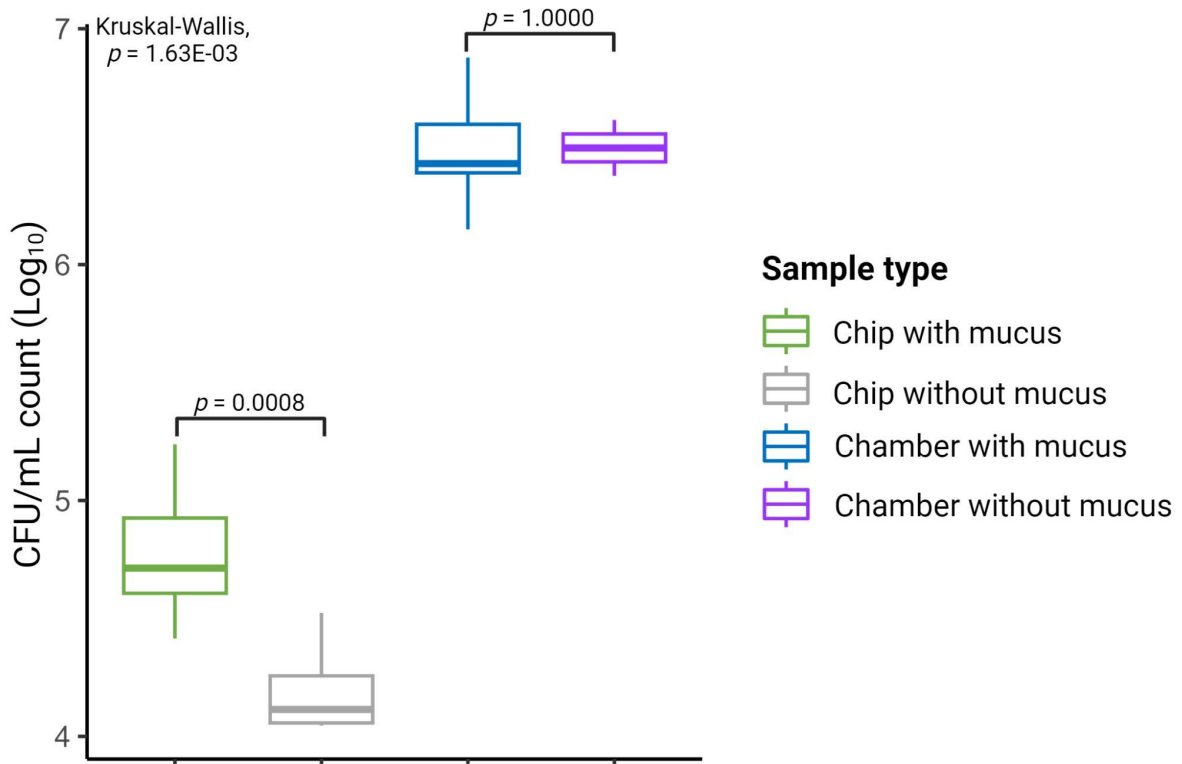

**FIG S1. Colony Forming Units (CFU) counts in Log<sub>10</sub> scale for the different culture methods in comparison to control for cell migration/leakage assay, related to STAR methods.** The CFU counts were significantly lower in the chips incubated without mucus (4.199, Log<sub>10</sub> CFU/ml,  $\pm$  0.223) in comparison to those incubated with (4.758 Log<sub>10</sub> CFU/ml,  $\pm$  0.237) mucus ( $p$ -value = 0.0008, ANOVA), indicating that the number of CFUs was 3.75 fold higher in incubated chips. The 0.03  $\mu$ m pore-size membrane used for the chips likely prevented the majority of cells in seawater from crossing into the device. There were no differences between CFU counts for chambers with (6.494 Log<sub>10</sub> CFU/ml,  $\pm$  0.207) and without (6.494 Log<sub>10</sub> CFU/ml,  $\pm$  0.167) inoculum ( $p$ -value = 1.000, ANOVA). This could be explained by the 0.2  $\mu$ m pore-size membranes of the chambers used, allowing a greater range of microorganisms to enter. To compensate for this issue, we only considered the ASVs that were observed in the original coral mucus sample for further analysis.

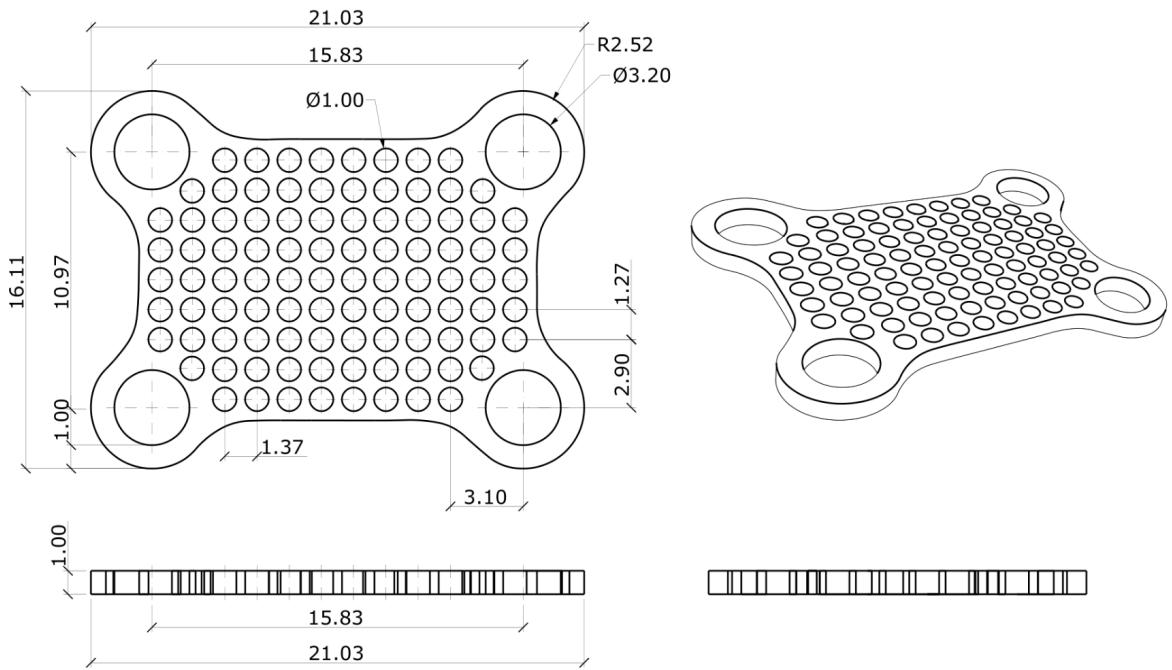

**FIG S2 - Technical specifications of the chip device project, related to STAR methods.**  
 The numbers represent the dimensions of the device in millimeters.

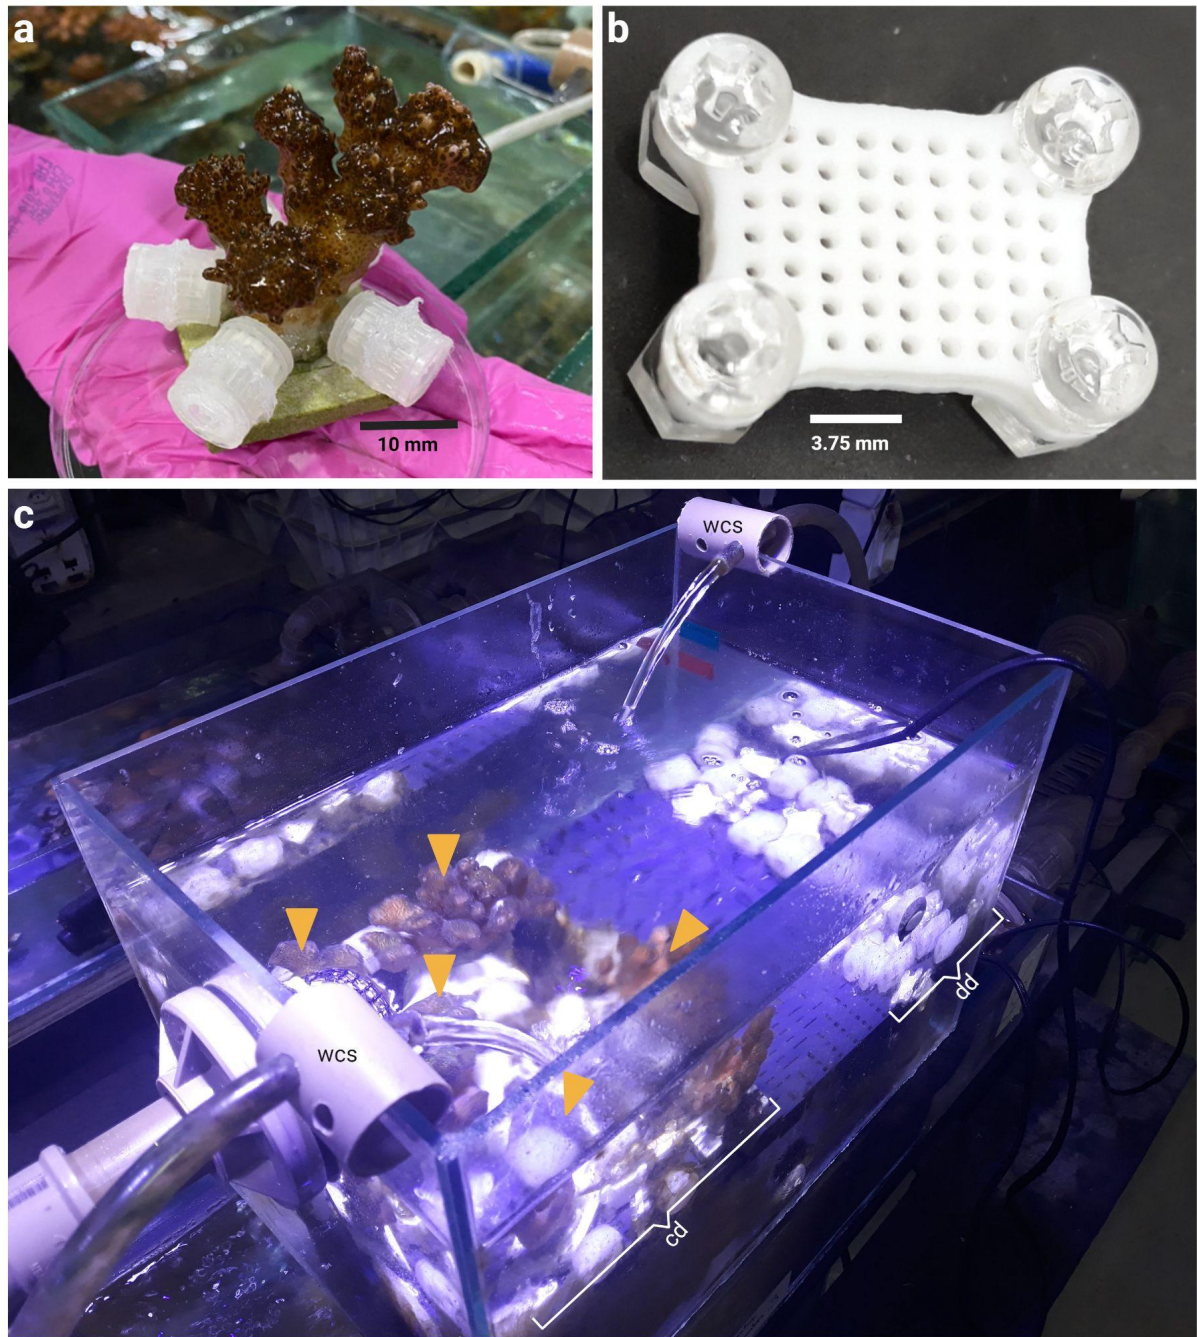

**FIG S3 - Chamber, Chip and Aquarium setup, related to STAR methods.** (a) the chamber devices close to the coral; (b) the chip sealed with screws and nuts; and (c) a representation of the aquarium setup with the devices incubated close (cd) to corals (yellow arrows) as well as distant devices (dd). ‘wcs’ indicates the two water circulation systems composed of two pumps (Mini A, Sarlo Better, São Caetano do Sul, Brazil) and one sump (not shown).
